# Supplementary material
Source: HighWire-hosted journal article supplement (https://jitc.bmj.com/content/8/1/e000447)
Supplement: inline-supplementary-material-2 [file inline-supplementary-material-2.pdf]

**Supplementary Table 1. Prognostic landscape of immune cell infiltrations in KIRC cohort**

| <b>Immune cell</b>     | <b>Relative cell fraction<sup>†</sup></b> | <b>HR<sup>‡</sup></b> | <b>95% CI</b>    | <b>p</b>     |
|------------------------|-------------------------------------------|-----------------------|------------------|--------------|
| <b>Macrophages</b>     | 0.381                                     | 10.29                 | 2.109-50.21      | <b>0.004</b> |
| <b>CD4+T cells</b>     | 0.239                                     | 16.96                 | 1.333-215.7      | <b>0.029</b> |
| <b>CD8+T cells</b>     | 0.133                                     | 6.393                 | 1.330-30.72      | <b>0.021</b> |
| <b>Mast cells</b>      | 0.051                                     | 0.000                 | 0.000-0.003      | <b>0.003</b> |
| <b>NK cells</b>        | 0.051                                     | 113.2                 | 0.007-1760705    | <b>0.337</b> |
| <b>Tregs</b>           | 0.034                                     | 4.233E+7              | 1.7665-1.014E+11 | <b>0.000</b> |
| <b>Dendritic cells</b> | 0.006                                     | 0.000                 | 0.000-6.174E+8   | <b>0.478</b> |
| <b>Neutrophils</b>     | 0.006                                     | 1860                  | 4.113-8.407E+5   | <b>0.016</b> |

<sup>†</sup>Relative cell fractions were recorded as median relative cell fractions, <sup>‡</sup> Hazard ratios were obtained via univariate analyses of absolute cell fractions for OS
